# Supplementary material for: Signatures of Diversifying Selection in European Pig Breeds
Source: PLoS Genet. 2013 Apr 25;9(4):e1003453. doi: 10.1371/journal.pgen.1003453 (PMC3636142; doi:10.1371/journal.pgen.1003453)
Supplement: Table S4 — Summary of genomic regions exhibiting diversifying selection in the ear trait analysis: prick vs intermediate. FST-windows that were found in the 99th percentile of values identified in the trait comparison were deemed as outliers. Regions separated by more than 5 markers are listed individually. (XLS) [file pgen.1003453.s007.xls]

## Sheet: Sheet1
Chrom	Position start	Position end
3	110261590	111310450
5	81098234	81119902
6	23851954
6	64364899	65612144
6	80601717
6	81657872	81731124
7	31861407	33481446
7	33618223	34189024
7	55430662	58188115
9	141534579	141547097
12	27494574	28391282
12	29063491	29674439
12	32226627	32356873
13	73562335	74382805
14	46072638	46211548
14	72785471
14	76005264	76334345
14	100643377	101181073
14	103573145	104552293
14	107893125	108386204
14	109858743	110165978
14	110983342	111426258
14	111866876	113160106
14	120986865	121391605
14	122956381	123475867
14	129120076	129393211
15	77875540
15	84170613	84964130
15	85728202	88036047
15	141799434
17	10087010	10386369
17	12823876	12967074
18	13918533	14262396
X	45518635
X	140920145	141552396
